# Supplementary material for: Facile fabrication of the visible-light-driven Bi2WO6/BiOBr composite with enhanced photocatalytic activity
Source: Royal Society of Chemistry journal article supplement (doi:10.1039/c3ra44191a), 2013-10-29
Supplement: c3ra44191a.pdf [file c3ra44191a.pdf]

## **Supplementary Information**

### **Facile fabrication of the visible-light-driven Bi<sub>2</sub>WO<sub>6</sub>/BiOBr composite with enhanced photocatalytic activity**

Jiexiang Xia,<sup>a</sup> Jun Di,<sup>a</sup> Sheng Yin,<sup>a</sup> Hui Xu,<sup>b</sup> Jing Zhang,<sup>a</sup> Yuanguo Xu,<sup>a</sup> Li Xu,<sup>a</sup>  
Huaming Li,<sup>\*,a</sup> and Mengxia Ji<sup>a</sup>

<sup>a</sup> *School of Chemistry and Chemical Engineering, Jiangsu University, 301 Xuefu Road, Zhenjiang, 212013, P R China*

<sup>b</sup> *School of the Environment, Jiangsu University, 301 Xuefu Road, Zhenjiang, 212013, P R China*

*E-mail: lhm@ujs.edu.cn, Tel: +86-511-88791108, Fax: +86-511-88791108*

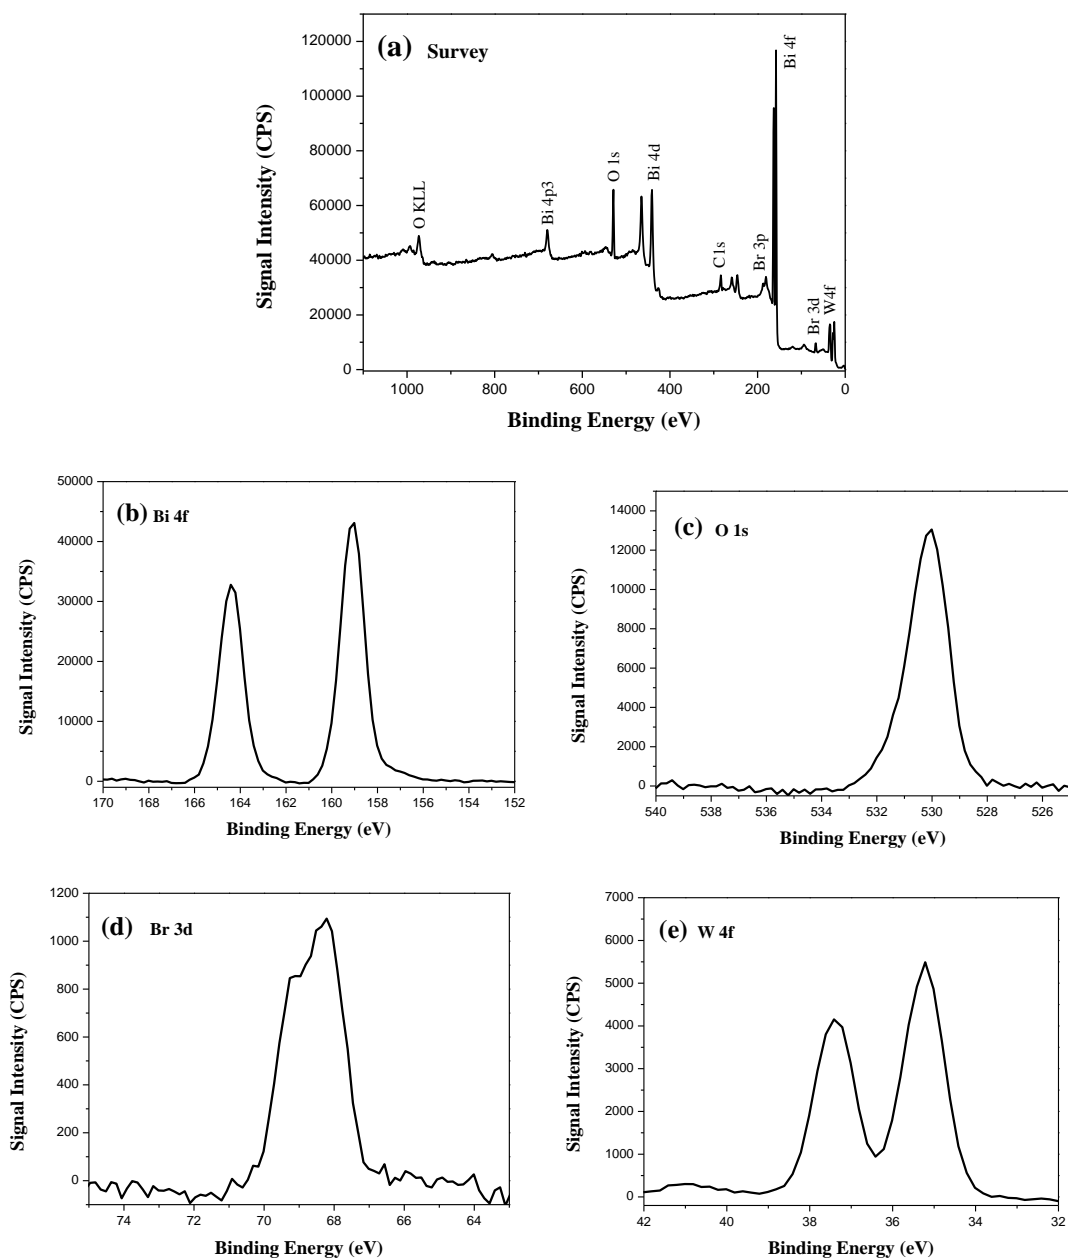

**Figure S1** XPS spectra of the as-prepared 50 at% Bi<sub>2</sub>WO<sub>6</sub>/BiOBr porous nanospheres. (a) Survey of the sample; (b) Bi 4f; (c) O 1s; (d) Br 3d; (e) W 4f.

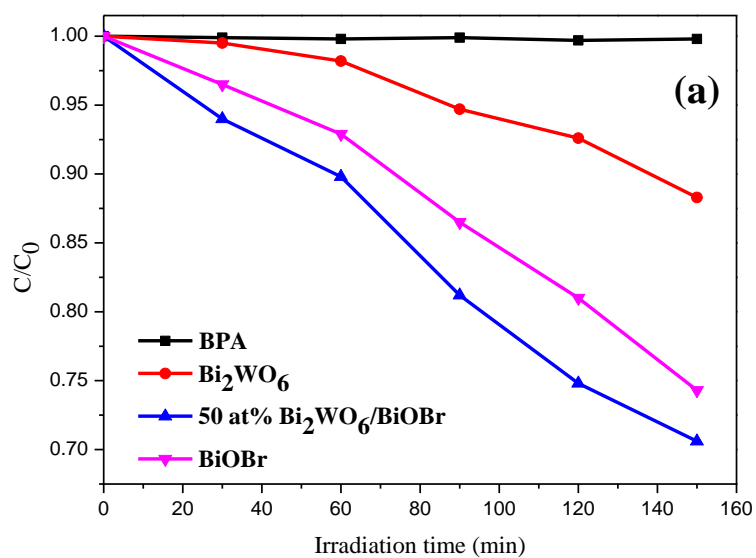

BPA

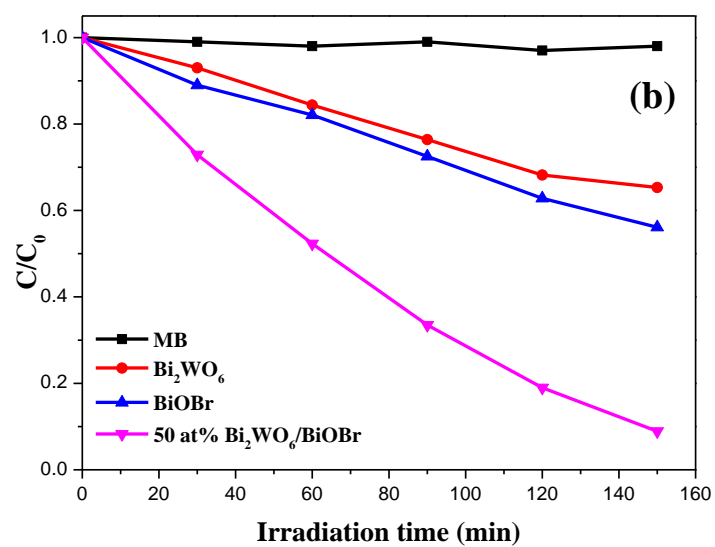

MB

**Figure S2** Photocatalytic degradation of BPA (a) and MB(b) in the presence of BiOBr, Bi<sub>2</sub>WO<sub>6</sub>, Bi<sub>2</sub>WO<sub>6</sub>/BiOBr under visible light irradiation
